# Supplementary material for: High fat diet drives obesity regardless the composition of gut microbiota in mice
Source: PubMed Central journal article supplement (PMC5006052; doi:10.1038/srep32484), 2016-08-31
Supplement: srep32484-s1.pdf [file srep32484-s1.pdf]

## Supplementary information

High fat diet drives obesity regardless the composition of gut microbiota in mice

Sylvie Rabot<sup>1</sup>, Mathieu Membrez<sup>2</sup>, Florence Blancher<sup>2</sup>, Bernard Berger<sup>2</sup>, Déborah Moine<sup>2,3</sup>, Lutz Krause<sup>2,4</sup>,  
Rodrigo Bibiloni<sup>2,5</sup>, Aurélia Bruneau<sup>1</sup>, Philippe Gérard<sup>1</sup>, Jay Siddharth<sup>3</sup>, Christian L. Lauber<sup>3</sup> and Chieh  
Jason Chou<sup>2,3\*</sup>

Supplementary figure S1: Fecal microbiota comparison of PL-R and PO-R mice after one week of HF feeding

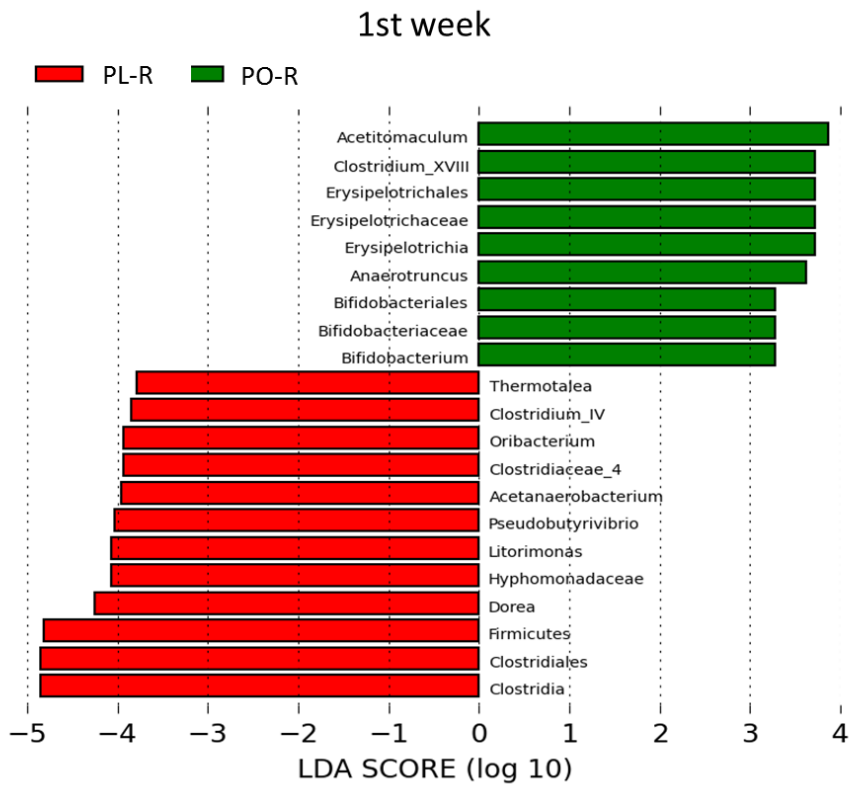

Germfree mice received the transplantation of the PL or PO microbiota and a high fat diet. Fecal samples of PL-R and PO-R mice were collected in 1 week after microbiota transplantation. Comparison of fecal microbiota was performed with LDA effect size (LEfSe). The red area indicates the over-abundance in PL-R microbiota where the green area indicated the over-abundance in PO-R microbiota.

Supplementary figure S2: Fecal microbiota comparison of PL-R and PO-R mice after 10 weeks of HF feeding

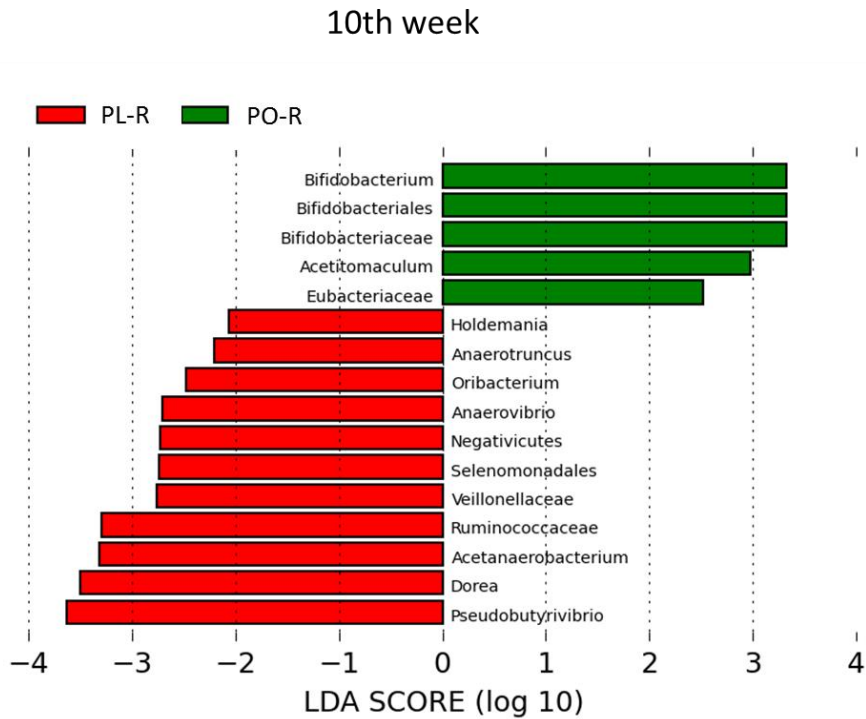

Microbiota composition of PL-R and PO-R mice after 10 weeks HF feeding. Comparison of fecal microbiota was performed with LDA effect size (LEfSe). The red area indicates the over-abundance in PL-R microbiota where the green area indicated the over-abundance in PO-R microbiota.

Supplementary figure S3: Oral glucose tolerance of PL-R and PO-R mice

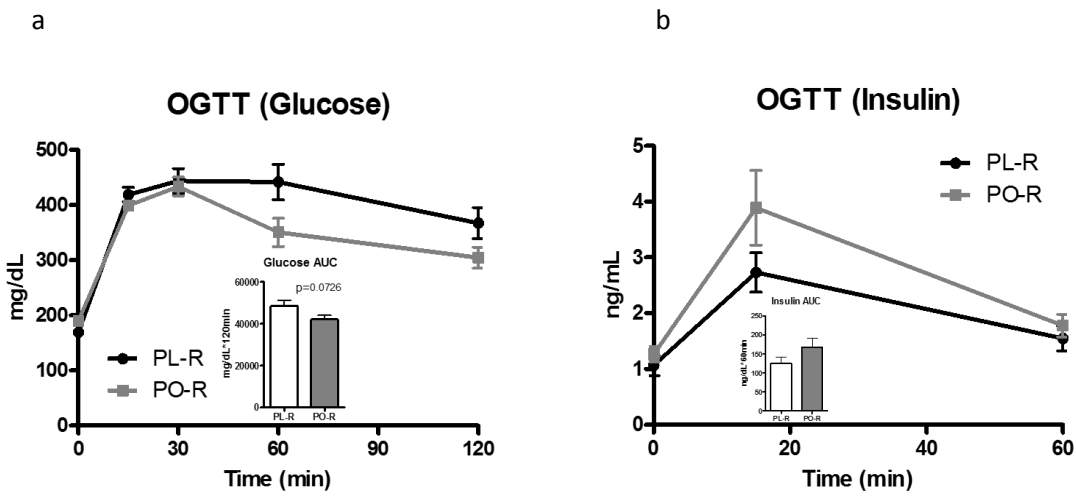

Oral glucose tolerance test was performed after 10 weeks HF feeding. After 6 hours fasting, a bolus of glucose (2 g/kg) was gavaged to PL-R and PO-R mice and glucose (a) and insulin (b) concentrations are shown. The inserts are area under the glucose and insulin curves. Data are mean  $\pm$  s.e.m., n=12/group. P=0.0726 by unpaired t-test when comparing glucose area under the curve or PL-R and PO-R mice.

Supplementary figure S4: Microbiota composition of the antibiotic treated DIO mice

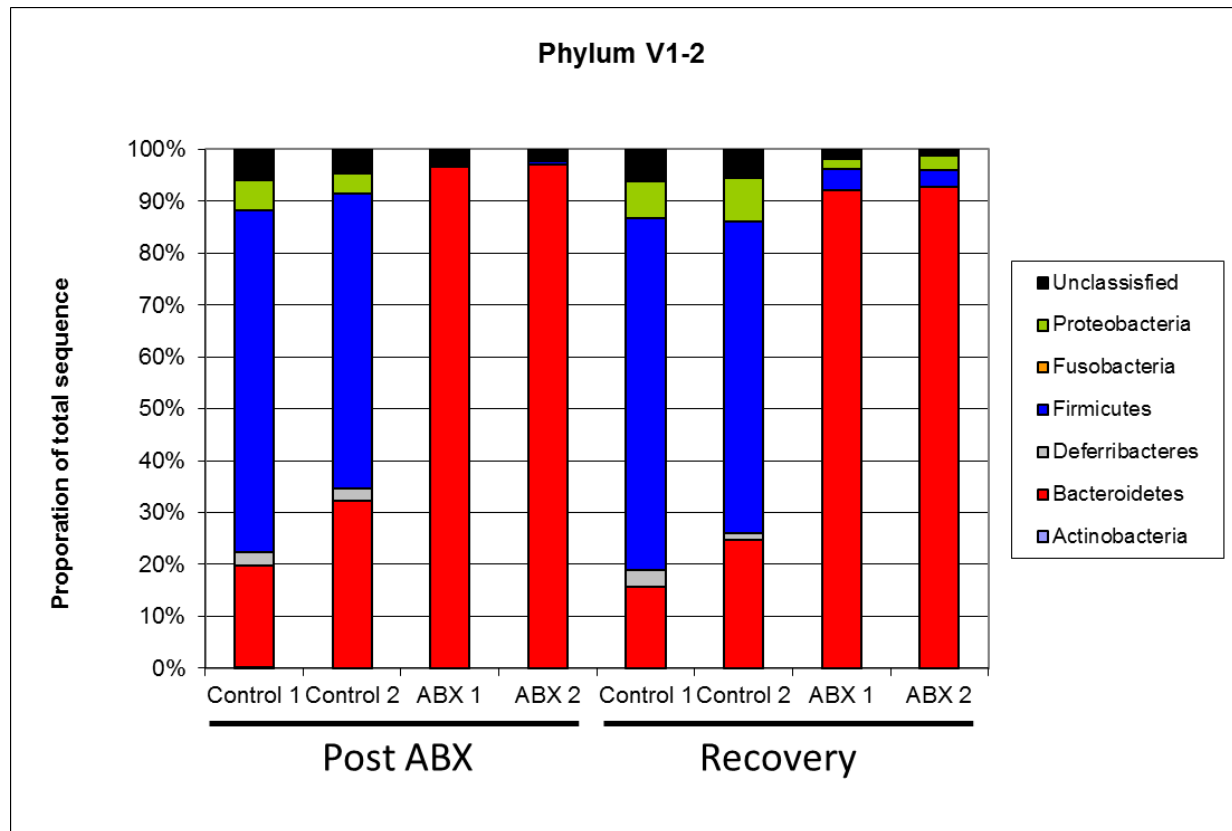

The V1-2 region of bacterial 16S rDNA genes were sequenced and the abundance of bacterial phyla is shown. DIO mice received either a combination of polymyxin B (0.5 g/L) and neomycin (1.0 g/L) in drinking water (ABX) or normal drinking water (Control) for two weeks. Caecal samples were taken from two mice in each group at the end of 2 weeks treatment period (post ABX) and at 4 weeks after the termination of the treatment (Recovery) for microbiota measurement.





| Taxon               | V4<br>NR10 | V4<br>NR11 | V4<br>NR12 | V4<br>NR13 | V4<br>NR14 | V4<br>NR15 | V4<br>NR1 | V4<br>NR2 | V4<br>NR3 | V4<br>NR4 | V4<br>NR5 | V4<br>NR6 | V4<br>NR7 | V4<br>NR8 | V4<br>RR10 | V4<br>RR12 | V4<br>RR13 | V4<br>RR14 | V4<br>RR15 | V4<br>RR16 | V4<br>RR2 | V4<br>RR3 | V4<br>RR4 | V4<br>RR5 | V4<br>RR6 | V4<br>RR7 | V4<br>RR8 | V4<br>RR9 |
|---------------------|------------|------------|------------|------------|------------|------------|-----------|-----------|-----------|-----------|-----------|-----------|-----------|-----------|------------|------------|------------|------------|------------|------------|-----------|-----------|-----------|-----------|-----------|-----------|-----------|-----------|
| Actinobacteria      | 1          | 14         | 12         | 0          | 1          | 4          | 1         | 8         | 16        | 14        | 4         | 25        | 2         | 5         | 4          | 1          | 1          | 6          | 13         | 6          | 5         | 0         | 0         | 6         | 9         | 1         | 1         | 7         |
| Bacteroidia         | 213        | 228        | 190        | 77         | 124        | 133        | 31        | 100       | 218       | 789       | 183       | 1814      | 48        | 170       | 132        | 120        | 143        | 257        | 171        | 486        | 350       | 63        | 76        | 467       | 386       | 143       | 142       | 171       |
| Sphingobacteria     | 0          | 0          | 0          | 0          | 0          | 0          | 0         | 0         | 0         | 0         | 0         | 0         | 0         | 0         | 0          | 0          | 0          | 0          | 0          | 0          | 0         | 0         | 0         | 0         | 0         | 0         | 0         | 0         |
| Deferribacteres     | 36         | 52         | 58         | 35         | 76         | 26         | 18        | 36        | 87        | 177       | 41        | 431       | 9         | 34        | 37         | 42         | 63         | 76         | 84         | 150        | 68        | 77        | 15        | 78        | 188       | 28        | 26        | 54        |
| Bacilli Bacilli     | 2          | 18         | 1          | 1          | 2          | 2          | 1         | 4         | 11        | 39        | 5         | 56        | 0         | 1         | 1          | 1          | 4          | 3          | 4          | 11         | 48        | 4         | 0         | 4         | 7         | 6         | 9         | 4         |
| Clostridia          | 717        | 965        | 881        | 370        | 859        | 476        | 143       | 507       | 409       | 2113      | 582       | 5637      | 250       | 498       | 766        | 611        | 659        | 1193       | 660        | 2163       | 1685      | 596       | 311       | 1952      | 2993      | 502       | 562       | 678       |
| Erysipelotrichi     | 12         | 127        | 250        | 22         | 105        | 67         | 5         | 162       | 481       | 408       | 98        | 600       | 38        | 73        | 129        | 97         | 85         | 122        | 297        | 399        | 271       | 9         | 59        | 221       | 210       | 87        | 25        | 247       |
| Alphaproteobacteria | 0          | 0          | 1          | 0          | 0          | 0          | 0         | 0         | 0         | 0         | 0         | 4         | 0         | 0         | 0          | 1          | 0          | 0          | 0          | 0          | 0         | 0         | 0         | 2         | 1         | 0         | 0         | 0         |
| Betaproteobacteria  | 0          | 0          | 0          | 0          | 0          | 0          | 0         | 0         | 0         | 0         | 0         | 1         | 0         | 0         | 0          | 0          | 0          | 0          | 0          | 0          | 0         | 0         | 0         | 0         | 0         | 0         | 0         | 0         |
| Deltaproteobacteria | 23         | 31         | 37         | 16         | 39         | 24         | 5         | 23        | 16        | 133       | 42        | 260       | 15        | 25        | 32         | 24         | 41         | 49         | 21         | 91         | 37        | 22        | 7         | 77        | 112       | 20        | 14        | 53        |
| Gammaproteobacteria | 1          | 1          | 0          | 7          | 0          | 0          | 0         | 1         | 1         | 1         | 19        | 4         | 10        | 0         | 0          | 0          | 1          | 2          | 0          | 0          | 4         | 1         | 0         | 0         | 1         | 0         | 3         | 0         |
| Verrucomicrobiae    | 0          | 0          | 0          | 0          | 0          | 0          | 0         | 0         | 9         | 1         | 0         | 0         | 0         | 0         | 0          | 0          | 0          | 0          | 0          | 0          | 0         | 0         | 0         | 0         | 0         | 0         | 0         | 0         |
| Unclassified        | 30         | 36         | 27         | 9          | 13         | 18         | 4         | 15        | 18        | 79        | 16        | 264       | 12        | 21        | 25         | 8          | 22         | 32         | 24         | 60         | 60        | 10        | 9         | 61        | 73        | 18        | 24        | 30        |









## Supplementary table S2

Microbiota composition of antibiotics treated and untreated mice.

Diet-induced obesity mice were treated with a mixture of polymyxin B and neomycin in drinking water for 2 weeks. Mice were sacrificed at the end of treatment and caecal contents were used for DNA extraction (post ABX group). In parallel, another group of mice was kept for additional 4 weeks without antibiotics (Recovery group) and their caecal contents were harvest for the DNA preparation. PCR was performed using primers specific to the V1-2 region of bacterial 16S rDNA gene. The resulting amplicons were sequenced using the GS FLX System. After removing the low quality reads, remaining sequences were classified using the RDP-Classifer (80% confidence cut-off). Results are presented at phylum, family and genus levels.

| RDP Classifications |                               |                 | V12       | V12       | V12   | V12   | V12       | V12       | V12   | V12   |
|---------------------|-------------------------------|-----------------|-----------|-----------|-------|-------|-----------|-----------|-------|-------|
| Rank                | Full                          | Taxon           | Post ABX  |           |       |       | Recovery  |           |       |       |
|                     |                               |                 | Control 1 | Control 2 | ABX 1 | ABX 2 | Control 1 | Control 2 | ABX 1 | ABX 2 |
| Phylum              | Root Bacteria Actinobacteria  | Actinobacteria  | 5         | 0         | 0     | 0     | 0         | 0         | 1     | 0     |
| Phylum              | Root Bacteria Bacteroidetes   | Bacteroidetes   | 477       | 509       | 2065  | 1971  | 229       | 578       | 1970  | 1814  |
| Phylum              | Root Bacteria Deferribacteres | Deferribacteres | 65        | 36        | 0     | 0     | 49        | 26        | 0     | 0     |
| Phylum              | Root Bacteria Firmicutes      | Firmicutes      | 1606      | 896       | 6     | 13    | 996       | 1401      | 85    | 64    |
| Phylum              | Root Bacteria Fusobacteria    | Fusobacteria    | 0         | 0         | 0     | 0     | 0         | 0         | 0     | 0     |
| Phylum              | Root Bacteria Proteobacteria  | Proteobacteria  | 140       | 63        | 0     | 0     | 106       | 194       | 41    | 52    |
| Phylum              | Unclassified                  | Unclassified    | 146       | 72        | 64    | 45    | 89        | 129       | 41    | 25    |
|                     |                               | Total           | 2439      | 1576      | 2135  | 2029  | 1469      | 2328      | 2138  | 1955  |

| RDP Classifications |                                                                                                    |                                | V12       | V12       | V12   | V12   | V12       | V12       | V12   | V12   |
|---------------------|----------------------------------------------------------------------------------------------------|--------------------------------|-----------|-----------|-------|-------|-----------|-----------|-------|-------|
| Rank                | Full                                                                                               | Taxon                          | Post ABX  |           |       |       | Recovery  |           |       |       |
|                     |                                                                                                    |                                | Control 1 | Control 2 | ABX 1 | ABX 2 | Control 1 | Control 2 | ABX 1 | ABX 2 |
| Genus               | Root Bacteria Actinobacteria Actinobacteria Bifidobacteriales Bifidobacteriaceae Bifidobacterium   | Actinobacteria Bifidobacterium | 4         | 0         | 0     | 0     | 0         | 0         | 0     | 0     |
| Genus               | Root Bacteria Bacteroidetes Bacteroidetes Bacteroidales Bacteroidaceae Bacteroides                 | Bacteroidetes Bacteroides      | 104       | 275       | 1835  | 1724  | 55        | 189       | 1510  | 1557  |
| Genus               | Root Bacteria Bacteroidetes Bacteroidetes Bacteroidales Porphyromonadaceae Parabacteroides         | Bacteroidetes Parabacteroides  | 8         | 15        | 103   | 165   | 5         | 14        | 225   | 163   |
| Genus               | Root Bacteria Bacteroidetes Bacteroidetes Bacteroidales Prevotellaceae Prevotella                  | Bacteroidetes Prevotella       | 0         | 0         | 0     | 0     | 0         | 0         | 1     | 0     |
| Genus               | Root Bacteria Bacteroidetes Bacteroidetes Bacteroidales Rikenellaceae Alistipes                    | Bacteroidetes Alistipes        | 199       | 124       | 103   | 61    | 112       | 260       | 211   | 84    |
| Genus               | Root Bacteria Deferribacteres Deferribacteres Deferribacterales Deferribacteraceae Mucispirillum   | Deferribacteres Mucispirillum  | 65        | 36        | 0     | 0     | 49        | 26        | 0     | 0     |
| Genus               | Root Bacteria Firmicutes Bacilli Bacillales Staphylococcaceae Staphylococcus                       | Firmicutes Staphylococcus      | 0         | 0         | 0     | 0     | 0         | 0         | 0     | 0     |
| Genus               | Root Bacteria Firmicutes Bacilli Lactobacillales Enterococcaceae Enterococcus                      | Firmicutes Enterococcus        | 0         | 0         | 1     | 2     | 0         | 0         | 0     | 2     |
| Genus               | Root Bacteria Firmicutes Bacilli Lactobacillales Lactobacillaceae Lactobacillus                    | Firmicutes Lactobacillus       | 1         | 6         | 1     | 0     | 1         | 1         | 3     | 0     |
| Genus               | Root Bacteria Firmicutes Bacilli Lactobacillales Leuconostocaceae Weissella                        | Firmicutes Weissella           | 1         | 0         | 0     | 0     | 0         | 0         | 0     | 0     |
| Genus               | Root Bacteria Firmicutes Bacilli Lactobacillales Streptococcaceae Lactococcus                      | Firmicutes Lactococcus         | 1         | 0         | 0     | 6     | 3         | 1         | 4     | 19    |
| Genus               | Root Bacteria Firmicutes Bacilli Lactobacillales Streptococcaceae Streptococcus                    | Firmicutes Streptococcus       | 0         | 0         | 0     | 0     | 0         | 0         | 0     | 0     |
| Genus               | Root Bacteria Firmicutes Clostridia Clostridiales IncertaeSedisXIII Anaerovorax                    | Firmicutes Anaerovorax         | 4         | 0         | 0     | 0     | 3         | 1         | 0     | 0     |
| Genus               | Root Bacteria Firmicutes Clostridia Clostridiales Lachnospiraceae Anaerostipes                     | Firmicutes Anaerostipes        | 0         | 0         | 2     | 0     | 0         | 0         | 2     | 0     |
| Genus               | Root Bacteria Firmicutes Clostridia Clostridiales Lachnospiraceae Butyrivibrio                     | Firmicutes Butyrivibrio        | 1         | 0         | 0     | 0     | 0         | 0         | 0     | 0     |
| Genus               | Root Bacteria Firmicutes Clostridia Clostridiales Lachnospiraceae Dorea                            | Firmicutes Dorea               | 1         | 0         | 0     | 0     | 0         | 0         | 0     | 0     |
| Genus               | Root Bacteria Firmicutes Clostridia Clostridiales Lachnospiraceae Johnsonella                      | Firmicutes Johnsonella         | 0         | 0         | 0     | 0     | 0         | 0         | 0     | 0     |
| Genus               | Root Bacteria Firmicutes Clostridia Clostridiales Lachnospiraceae Roseburia                        | Firmicutes Roseburia           | 1         | 1         | 0     | 0     | 34        | 0         | 0     | 0     |
| Genus               | Root Bacteria Firmicutes Clostridia Clostridiales Ruminococcaceae Anaerotruncus                    | Firmicutes Anaerotruncus       | 0         | 1         | 0     | 0     | 3         | 6         | 0     | 0     |
| Genus               | Root Bacteria Firmicutes Clostridia Clostridiales Ruminococcaceae Faecalibacterium                 | Firmicutes Faecalibacterium    | 3         | 0         | 0     | 0     | 0         | 0         | 0     | 0     |
| Genus               | Root Bacteria Firmicutes Clostridia Clostridiales Ruminococcaceae Sporobacter                      | Firmicutes Sporobacter         | 0         | 0         | 0     | 0     | 0         | 0         | 0     | 0     |
| Genus               | Root Bacteria Firmicutes Clostridia Clostridiales Ruminococcaceae Subdoligranulum                  | Firmicutes Subdoligranulum     | 1         | 0         | 0     | 0     | 0         | 0         | 0     | 0     |
| Genus               | Root Bacteria Firmicutes Clostridia Clostridiales Veillonellaceae Megasphaera                      | Firmicutes Megasphaera         | 0         | 0         | 0     | 0     | 0         | 1         | 0     | 0     |
| Genus               | Root Bacteria Firmicutes Erysipelotrichi Erysipelotrichales Erysipelotrichaceae Allobaculum        | Firmicutes Allobaculum         | 0         | 0         | 0     | 0     | 0         | 0         | 0     | 0     |
| Genus               | Root Bacteria Firmicutes Erysipelotrichi Erysipelotrichales Erysipelotrichaceae Catenibacterium    | Firmicutes Catenibacterium     | 0         | 0         | 0     | 0     | 0         | 1         | 0     | 0     |
| Genus               | Root Bacteria Fusobacteria Fusobacteria Fusobacteriales Fusobacteriaceae Fusobacterium             | Fusobacteria Fusobacterium     | 0         | 0         | 0     | 0     | 0         | 0         | 0     | 0     |
| Genus               | Root Bacteria Proteobacteria Deltaproteobacteria Desulfovibrionales Desulfovibrionaceae Bilophila  | Proteobacteria Bilophila       | 132       | 57        | 0     | 0     | 101       | 183       | 0     | 0     |
| Genus               | Root Bacteria Proteobacteria Gammaproteobacteria Enterobacteriales Enterobacteriaceae Citrobacter  | Proteobacteria Citrobacter     | 0         | 0         | 0     | 0     | 0         | 0         | 0     | 1     |
| Genus               | Root Bacteria Proteobacteria Gammaproteobacteria Enterobacteriales Enterobacteriaceae Enterobacter | Proteobacteria Enterobacter    | 0         | 0         | 0     | 0     | 0         | 0         | 4     | 2     |
| Genus               | Root Bacteria Proteobacteria Gammaproteobacteria Enterobacteriales Enterobacteriaceae Klebsiella   | Proteobacteria Klebsiella      | 0         | 0         | 0     | 0     | 0         | 0         | 0     | 0     |
| Genus               | Root Bacteria Proteobacteria Gammaproteobacteria Enterobacteriales Enterobacteriaceae Shigella     | Proteobacteria Shigella        | 0         | 0         | 0     | 0     | 0         | 0         | 0     | 0     |
| Genus               | Unclassified                                                                                       | Unclassified                   | 1913      | 1061      | 90    | 71    | 1103      | 1645      | 178   | 127   |
|                     |                                                                                                    | Total                          | 2439      | 1576      | 2135  | 2029  | 1469      | 2328      | 2138  | 1955  |
